# Supplementary material for: Osteoclast-derived exosomal miR-214-3p inhibits osteoblastic bone formation
Source: PubMed Central journal article supplement (PMC4786676; doi:10.1038/ncomms10872), 2016-03-07
Supplement: ncomms10872-s1.pdf [file ncomms10872-s1.pdf]

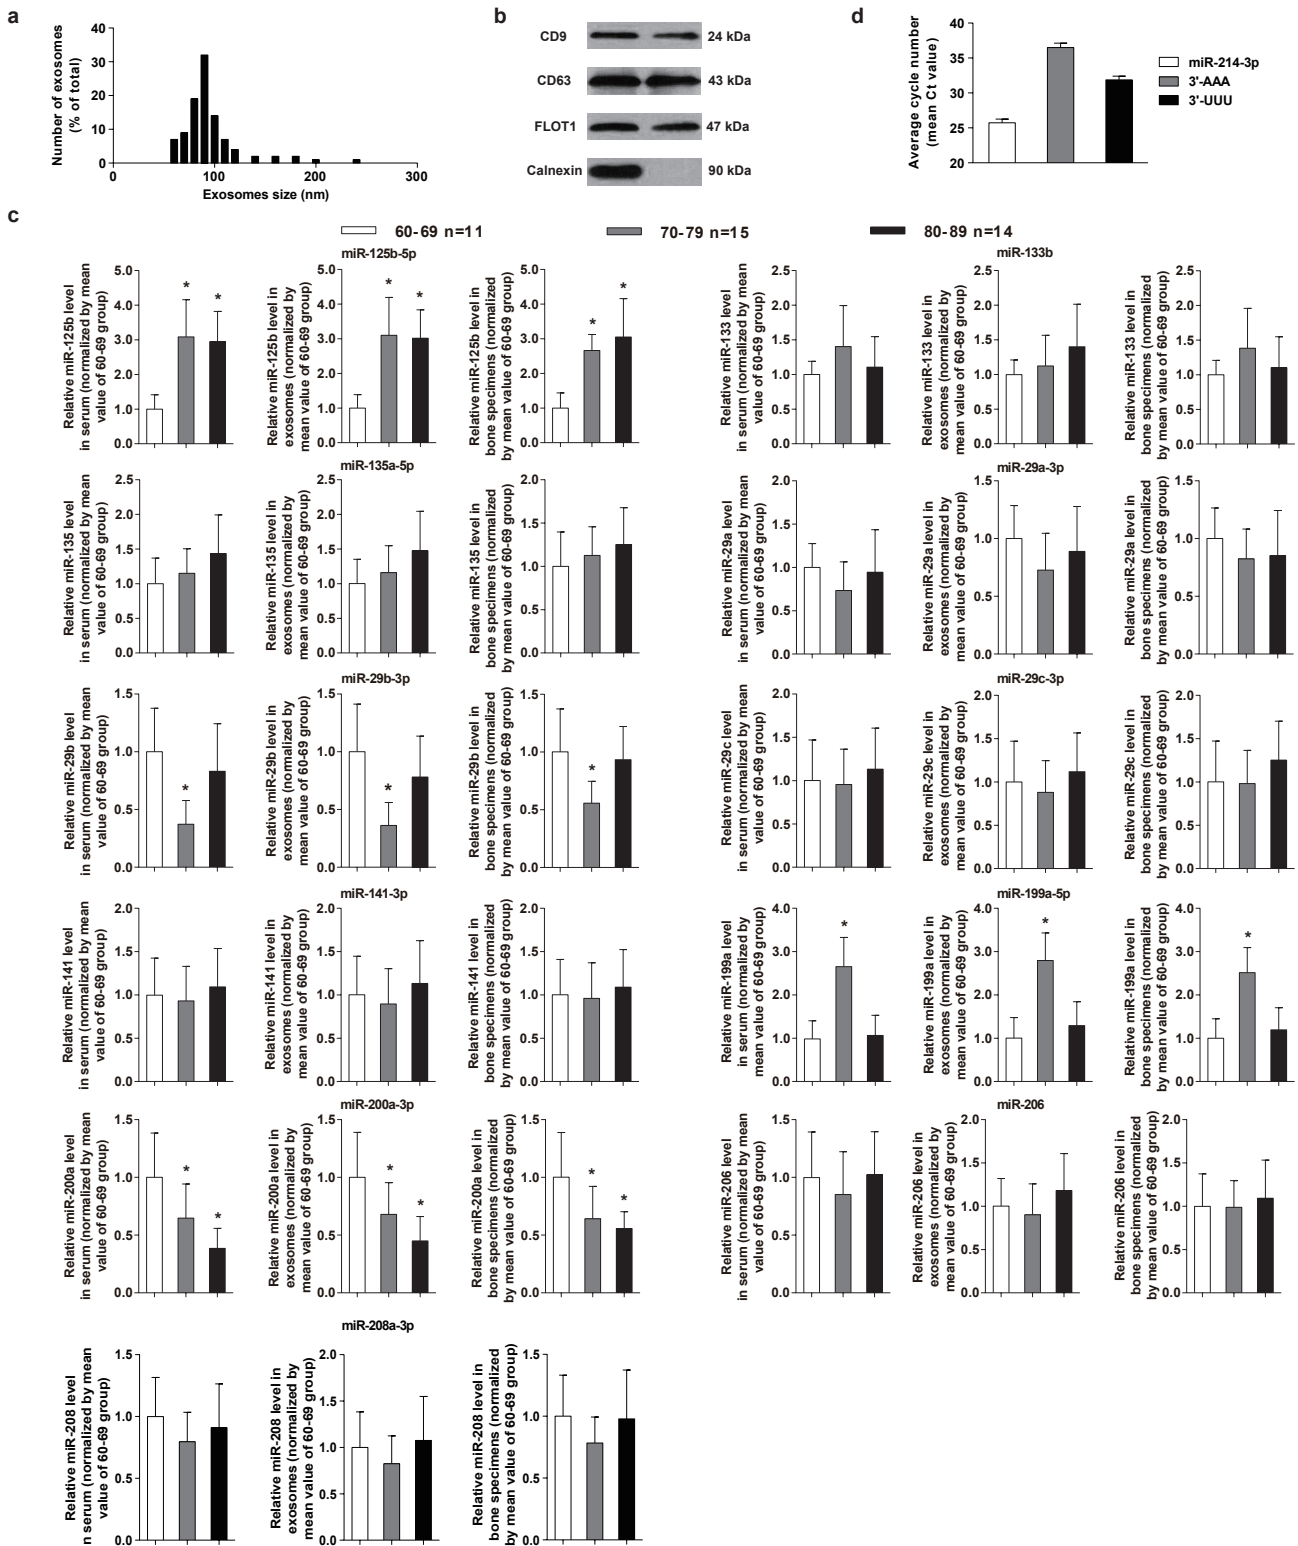

**Supplementary Figure 1 Characterization of serum exosomes and the age-related expression pattern of the other eleven bone metabolism-related miRNAs in whole serum, serum exosomes and bone specimens from elderly patients with fractures.** (a) The size distribution of serum exosomes. (b) Western blot analysis of the exosomal membrane markers (CD9, CD63 and FLOT1) and Calnexin (a cytoplasmic protein not present in exosomes) in the lysates of ultracentrifugation pellets isolated from whole serum. (c) Real-time PCR analysis of the age-related changes in the other eleven miRNAs levels in whole serum (left panel), serum exosomes (middle panel) and bone specimens (right panel) from elderly patients with fractures, respectively. (d) Real-time PCR analysis of the expression of canonical miR-214-3p, 3' end adenylated miR-214-3p (3'-AAA), and 3' end uridylated miR-214-3p (3'-UUU) in exosomal RNA fractions by TaqMan microRNA assays and Custom TaqMan small RNA assays. Note: All data were presented as the mean  $\pm$  s.d. The relative miRNAs or mRNA levels were normalized to the mean value of the 60-69 group. Human RUN6B are used as the internal control. Data are the mean  $\pm$  s.d. \* $P < 0.05$  v.s. 60-69 group. One-way ANOVA with a *post-hoc* test was performed.

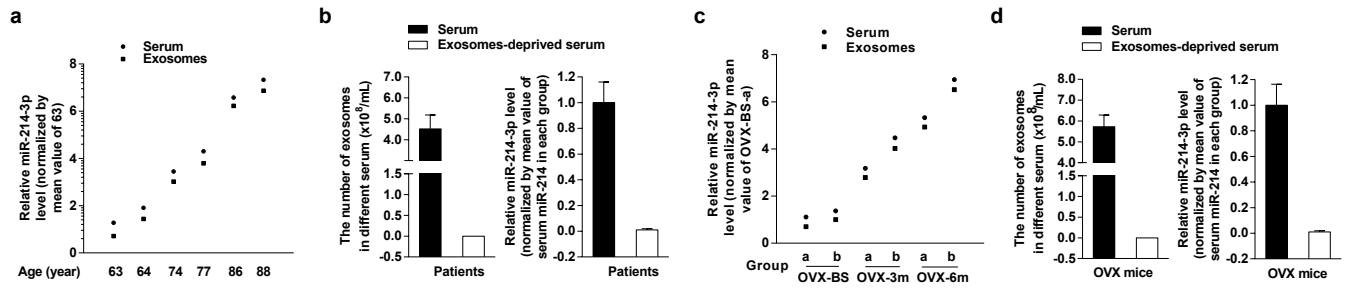

**Supplementary Figure 2 The serum miR-214-3p is concentrated in serum exosomes.** (a) Real-time PCR analysis of the relative miR-214-3p levels in serum and serum exosomes from elderly patients with fractures. (b) The number of exosomes and the miR-214-3p levels in serum and exosomes-depleted serum from elderly patients with fractures. (c) Real-time PCR analysis of the relative miR-214-3p levels in serum and serum exosomes from OVX mice. (d) The number of exosomes and the miR-214-3p levels in serum and exosomes-depleted serum from the OVX mice. Equal volume of serum was used in each test. All data are the mean  $\pm$  s.d.

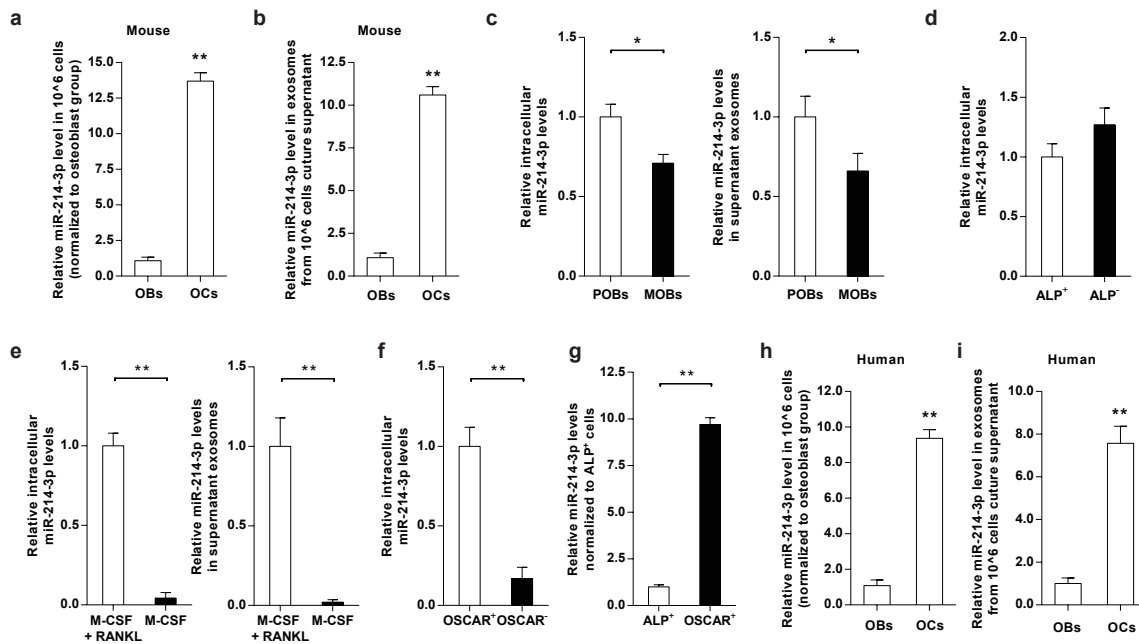

**Supplementary Figure 3 miR-214-3p is abundant in osteoclasts / the osteoclast-derived supernatant exosomes rather than in osteoblasts / the osteoblast-derived supernatant exosomes.** (a) Real-time PCR analysis of the miR-214-3p levels in mouse osteoblasts (mouse OBs) differentiated from calvarial bone-derived osteoblast precursor cells (POBs) and osteoclasts (mouse OCs) differentiated from bone marrow macrophages (BMMs). (b) Real-time PCR of the levels of exosomal miR-214-3p in the supernatant of mouse OBs and mouse OCs, respectively. (c) Real-time PCR analysis of the miR-214-3p levels in cells and supernatant exosomes from the POBs or mature osteoblasts (MOBs) differentiated from POBs in osteogenic medium for 9 days. (d) Real-time PCR analysis of the miR-214-3p levels in ALP<sup>+</sup> (purified osteoblasts) and ALP<sup>-</sup> cells isolated from the calvarial bone-derived osteoblast precursor cells after stimulation with osteogenic medium for 9 days by magnetic-activated cell sorting (MACS). The ALP<sup>+</sup> cells were isolated by anti-ALP antibody (Rabbit IgG) in combination with anti-Rabbit IgG MicroBeads. (e) Real-time PCR analysis of the miR-214-3p levels in cells and supernatant exosomes from the BMMs at day 7 after induction either by M-CSF (30 ng/ml) alone or by M-CSF (30 ng/ml) and RANKL (5 ng/ml). (f) Real-time PCR analysis of the miR-214-3p levels in OSCAR<sup>+</sup> (purified osteoclasts) and OSCAR<sup>-</sup> cells isolated from the BMMs at day 7 after induction by M-CSF (30 ng/ml) and RANKL (5 ng/ml) by MACS. The OSCAR<sup>+</sup> cells were isolated by anti-OSCAR antibody (Rat IgG) in combination with anti-Rat IgG MicroBeads. (g) Real-time PCR analysis of the miR-214-3p levels in either OSCAR<sup>+</sup> cells (purified osteoclasts) or ALP<sup>+</sup> cells (purified osteoblasts). (h) Real-time PCR analysis of the levels of miR-214-3p in human primary osteoblasts (human OBs) and human osteoclasts (human OCs) differentiated from human peripheral blood mononuclear cells. (i) Real-time PCR analysis of the levels of exosomal miR-214-3p in the supernatant of human OBs and human OCs. All data are the mean  $\pm$  s.d. of 4 independent experiments. \* $P$ <0.05. \*\* $P$ <0.01. Student's  $t$  test was performed.

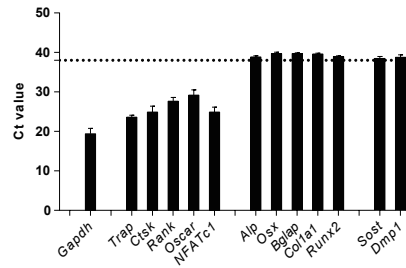

**Supplementary Figure 4 The expression of osteoclast/osteoblast/osteocyte marker genes in CTSK<sup>+</sup> cells isolated from femur cryosections by laser-captured microdissection.** Real-time PCR analysis of the Ct value of osteoclast marker genes (*Trap*, *Ctsk*, *Rank*, *Oscar* & *NFATc1*), osteoblast marker genes (*Alp*, *Osx*, *Bglap*, *Col1a1* & *Runx2*), osteocyte marker genes (*Sost* & *Dmp1*) and reference gene (*Gapdh*). Dotted line indicates the Ct value of 38. Data are the mean  $\pm$  s.d.

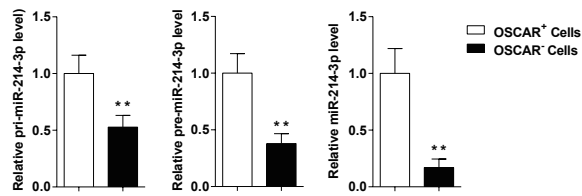

**Supplementary figure 5 Pri-miR-214-3p, pre-miR-214-3p and mature miR-214 are abundant in osteoclasts rather than the other bone marrow cells.** Real-time PCR analysis of the levels of pri-miR-214-3p, pre-miR-214-3p and mature miR-214 in either Osteoclasts (OSCAR<sup>+</sup>) or non-osteoclasts (OSCAR<sup>-</sup> cells), respectively. OSCAR<sup>+</sup>/OSCAR<sup>-</sup> cells were isolated from whole bone marrow of aging OVX mice by magnetic-activated cell sorting using anti-OSCAR antibody (Rat IgG) in combination with anti-Rat IgG MicroBeads. All data are the mean  $\pm$  s.d. of 6 biological replicates. \*\* $P < 0.01$ . Student's *t* test was performed.

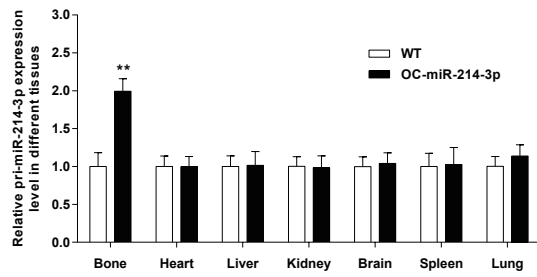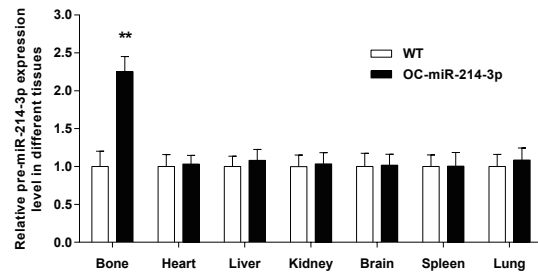

**Supplementary Figure 6 Characterization of pri-miR-214-3p and pre-miR-214-3p expression in OC-miR-214-3p mice.** Real-Time PCR of the pri-miR-214-3p and pre-miR-214-3p levels in bone and other tissues (normalized to the mean values of WT mice) from OC-miR-214 and WT mice, respectively.  $n=6$  for each group. All data are the mean  $\pm$  s.d. \*\* $P < 0.01$  vs. WT. Student's  $t$  test was performed.

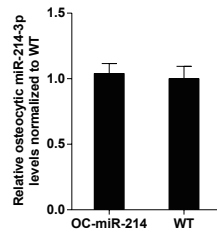

**Supplementary figure 7 The expression of miR-214-3p in osteocytes from OC-miR-214 mice and the WT controls.** Real-Time PCR of the levels of osteocytic miR-214-3p in OC-miR-214-3p mice and WT controls, respectively. The osteocyte RNA were extracted from the tibia diaphysis after sequential digestions in 0.2% type 1 collagenase / 0.05% trypsin solution, 0.53mM EDTA / 0.05% trypsin solution and 0.2% collagenase / 0.05% trypsin solution at 37°C.  $n=6$  for each group. Data are the mean  $\pm$  s.d.

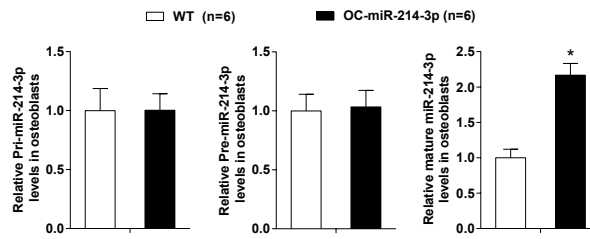

**Supplementary Figure 8 The expression of pri-miR-214-3p, pre-miR-214-3p and mature miR-214-3p in osteoblasts in OC-miR-214-3p mice.** Real-time PCR analysis of the levels of pri-miR-214-3p, pre-miR-214-3p and mature miR-214-3p in osteoblasts (ALP<sup>+</sup> cells) isolated from bone marrow cells by fluorescence-activated cell sorting (FACS) in WT and OC-miR-214-3p mice. The *n* value for each group is indicated at the top of the histograms. All data are the mean  $\pm$ s.d. \**P* < 0.05. Student's *t* test was performed.



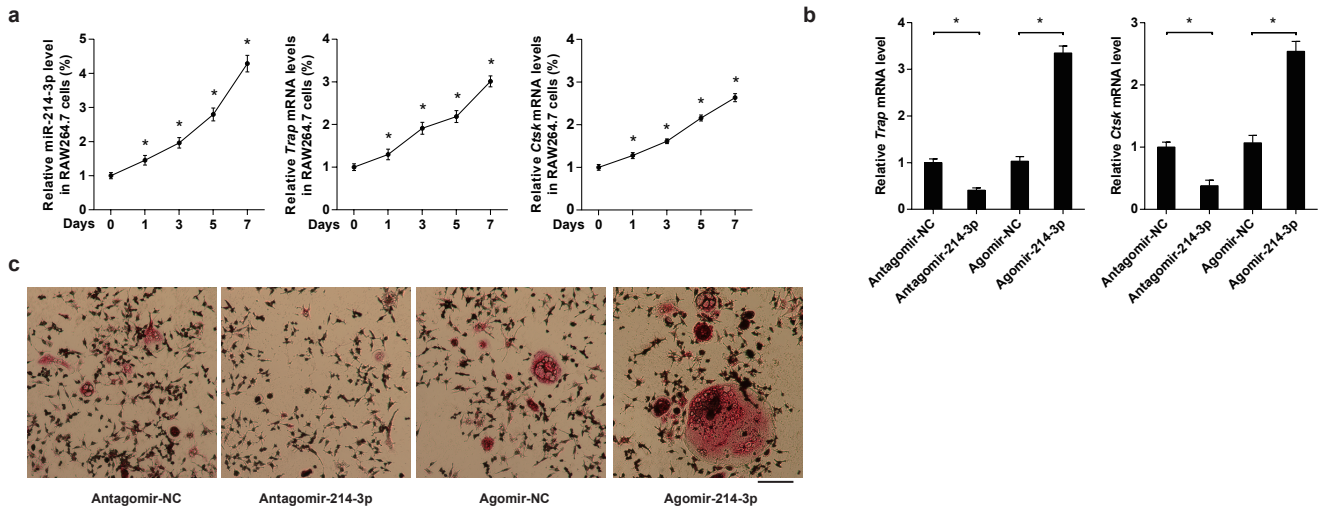

**Supplementary Figure 9 miR-214-3p promotes osteoclast differentiation *in vitro*.** (a) Real-time PCR analysis of the levels of miR-214-3p (left) and mRNA of *Trap* and *Ctsk* (right) in RAW264.7 cells at day 1, 3, 5 and 7 after induction by M-CSF (30 ng/ml) and RANKL (5 ng/ml), respectively. \* $P < 0.05$  vs. previous time point. One-way ANOVA with a *post-hoc* test was performed. (b) Real-time PCR analysis of *Trap* and *Ctsk* mRNA levels in RAW264.7 cells after treatment of antagomir-214-3p or agomir-214-3p or their corresponding negative controls, respectively. \* $P < 0.05$ . One-way ANOVA with a *post-hoc* test was performed. (c) Representative micrographs of TRAP<sup>+</sup> osteoclasts after treatment with antagomir-214-3p or agomir-214-3p. Scale bar, 50  $\mu$ m. Data are the mean  $\pm$  s.d. of 3 independent experiments.

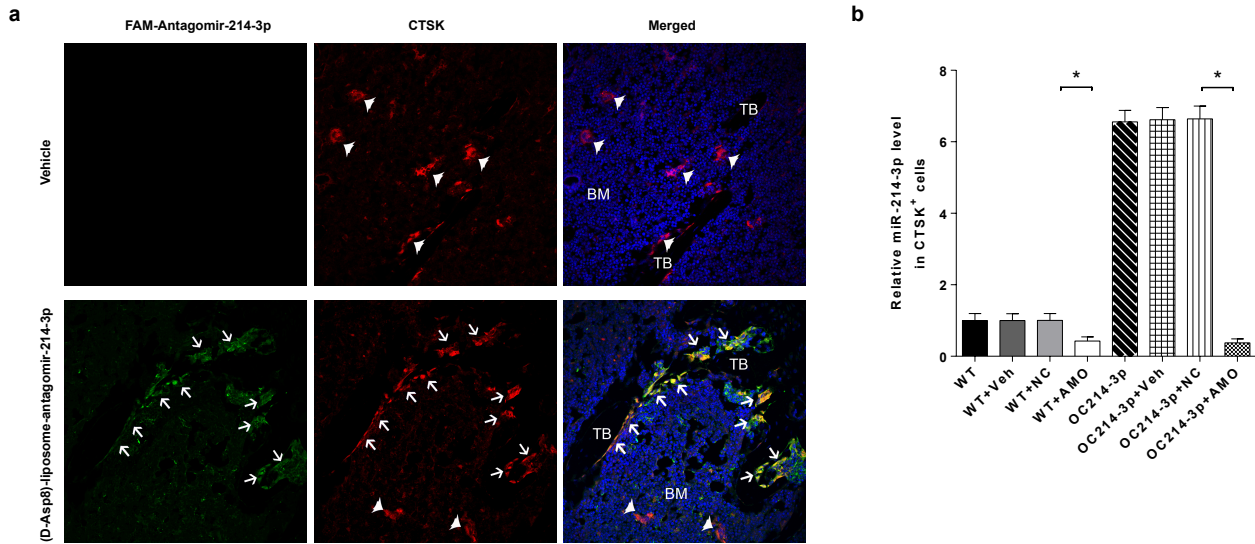

**Supplementary figure 10 Cellular distribution of (D-Asp<sub>8</sub>)-liposome-antagomir-214-3p and miR-214-3p levels after rescue treatment *in vivo*.** (a) Representative confocal images of the distal femur cryosections from mice after intravenous injection of vehicle (upper panel) or (D-Asp<sub>8</sub>)-liposome-antagomir-214 (lower panel). The antagomir-214 was labelled with FAM (green, left column). Immunofluorescence staining was performed to detect the CTSK<sup>+</sup> osteoclasts (red, middle column). Merged images with DAPI staining showing the co-localization of antagomir-214 with CTSK<sup>+</sup> osteoclasts (right column). Scale bars, 100  $\mu$ m. Arrows indicate CTSK<sup>+</sup> cells with co-localization of FAM-antagomir-214. Arrow heads indicate CTSK<sup>+</sup> cells without co-localization of FAM-antagomir-214. (b) Real-time PCR analysis of the miR-214-3p levels in CTSK<sup>+</sup> cells isolated from distal femur cryosections by laser-captured microdissection in OC-miR-214-3p or WT mice after treatment with PBS, Veh, NC or AMO.  $n=5\sim7$  for each group. Data are the mean  $\pm$  s.d. \* $P<0.05$ . One-way ANOVA with a *post-hoc* test was performed.

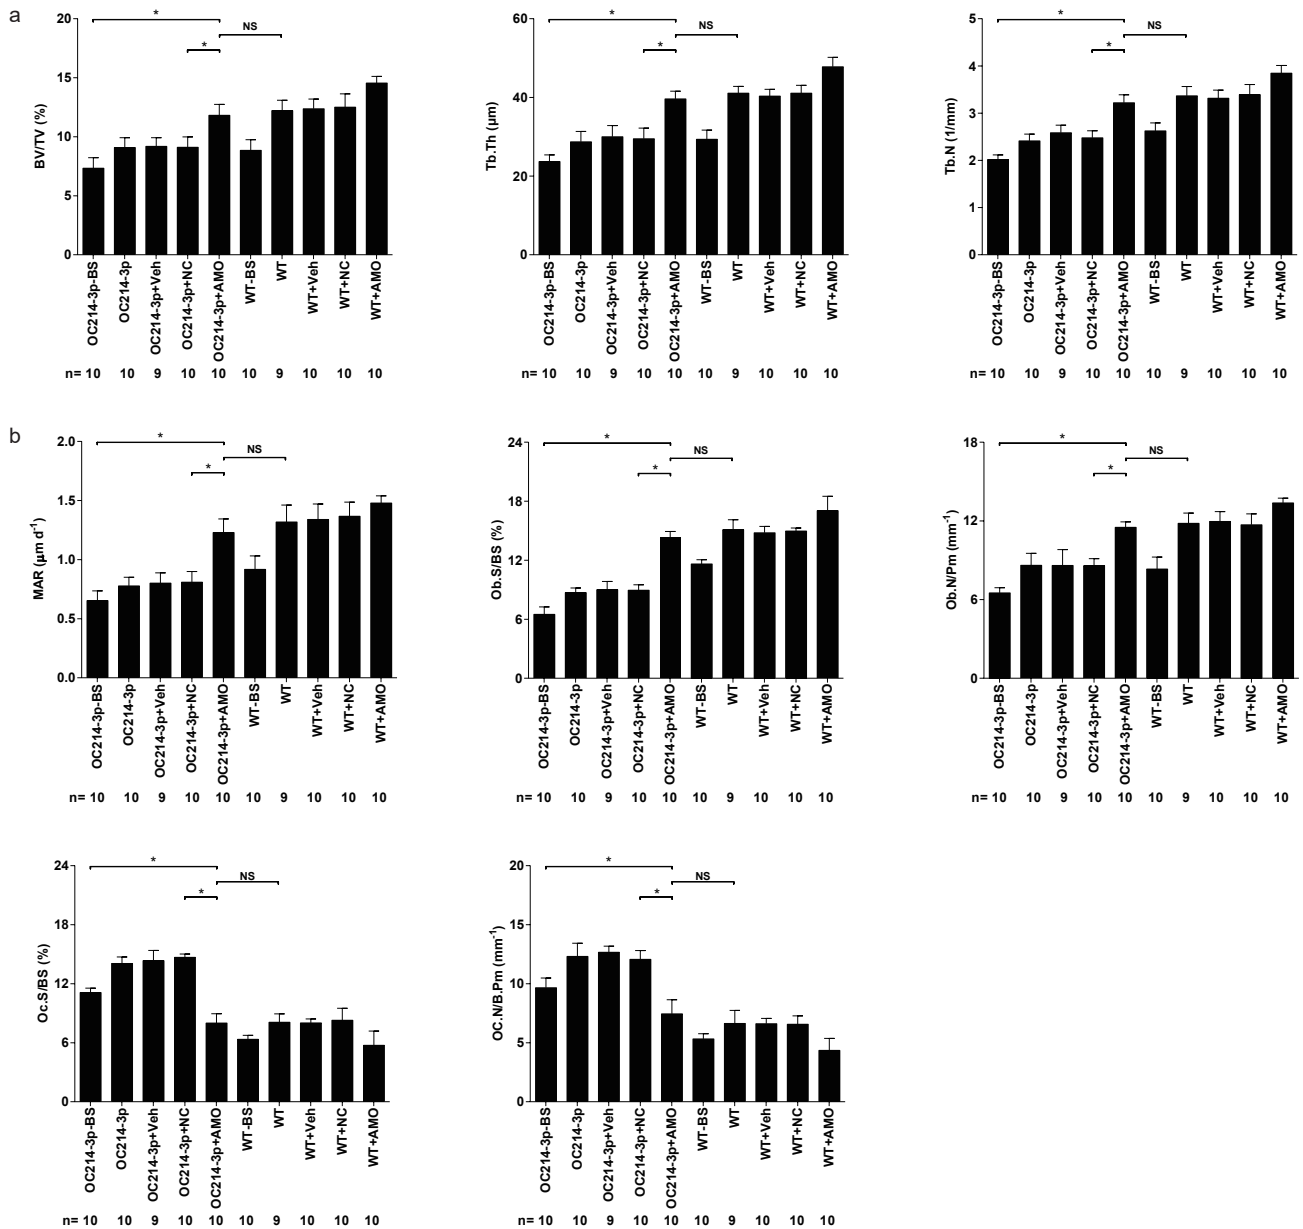

**Supplementary Figure 11 The effect of osteoclast-targeted antagomiR-214-3p treatment on bone formation in OC-miR-214-3p mice.** (a) The value of micro-CT parameters (BV/TV, Tb.Th and Tb.N) at the distal femur metaphysis in each group. (b) The value of bone histomorphometry parameters (MAR, Ob.S/BS, Ob.N/B.Pm, Oc.S/BS and Oc.N/B.Pm) at the distal femur metaphysis in each group. OC214-3p/WT: OC-miR-214/WT mice treated with PBS, OC214-3p/WT-BS: age-matched OC-miR-214-3p or WT mice that were sacrificed before treatment as baseline, OC214-3p/WT+Veh: OC-miR-214-3p or WT mice treated with (D-Asp)<sub>8</sub>-liposome (vehicle) alone, OC214-3p/WT+NC: OC-miR-214-3p or WT mice treated with (D-Asp)<sub>8</sub>- liposome-antagomir nonsense control, OC214-3p/WT+AMO: OC-miR-214-3p or WT mice treated with (D-Asp)<sub>8</sub>- liposome-antagomir-214-3p. *n*=9~10 for each group. Data are the means ± s.d. \**P*<0.05. NS, not significant. One-way ANOVA with a *post-hoc* test was performed.

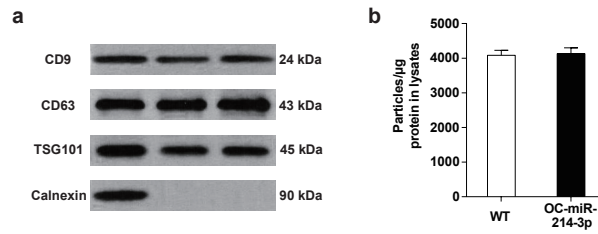

**Supplementary Figure 12 Characterization of exosomes isolated from the supernatant in the co-culture systems.** (a) Western blot analysis of the exosome proteins (CD9, CD63 and TSG101) and Calnexin in supernatant extracts from OC-miR-214-3p or WT osteoclasts. (b) The number of particles assessed by Nanosight technology after normalization with the total amount of protein of cell lysates from the above supernatant. Data are the mean  $\pm$  s.d. of 4 independent experiments.

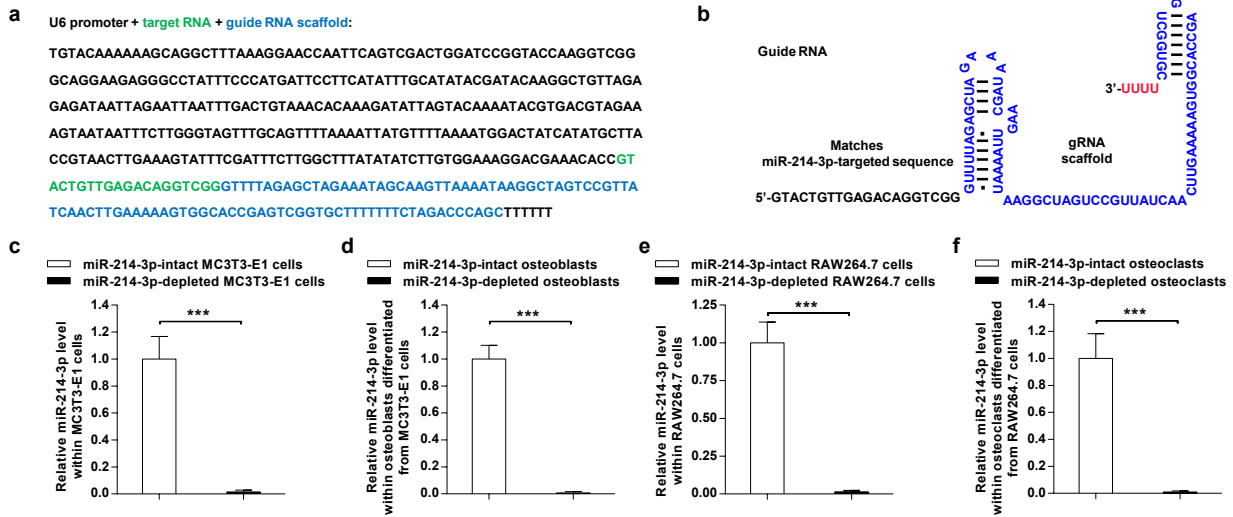

**Supplementary Figure 13 RNA-guided genome editing of miR-214-3p locus using the engineered CRISPR-Cas9 system in MC3T3-E1 cells and RAW264.7 cells.** (a) A U6 promoter based expression scheme for the guide RNAs targeted miR-214-3p locus and (b) predicted RNA transcript secondary structure. (c) Real-time PCR analysis of the miR-214-3p levels in either miR-214-3p-depleted MC3T3-E1 cells after miR-214-3p gene editing by CRISPR-Cas system or miR-214-3p-intact MC3T3-E1 cells. (d) Real-time PCR analysis of the miR-214-3p levels in osteoblasts differentiated from either miR-214-3p-depleted MC3T3-E1 cells or miR-214-3p-intact MC3T3-E1 cells in osteogenic medium. (e) Real-time PCR analysis of the miR-214-3p levels in either miR-214-3p-depleted RAW264.7 cells after miR-214-3p gene editing by CRISPR-Cas system or miR-214-3p-intact RAW264.7 cells. (f) Real-time PCR analysis of the miR-214-3p levels in osteoclasts differentiated from either miR-214-3p-depleted RAW264.7 cells or miR-214-3p-intact RAW264.7 cells in osteoclastogenic medium. All data are the mean  $\pm$  s.d. of 3 independent experiments. \*\*\* $P < 0.001$  vs. WT. Student's  $t$  test was performed.

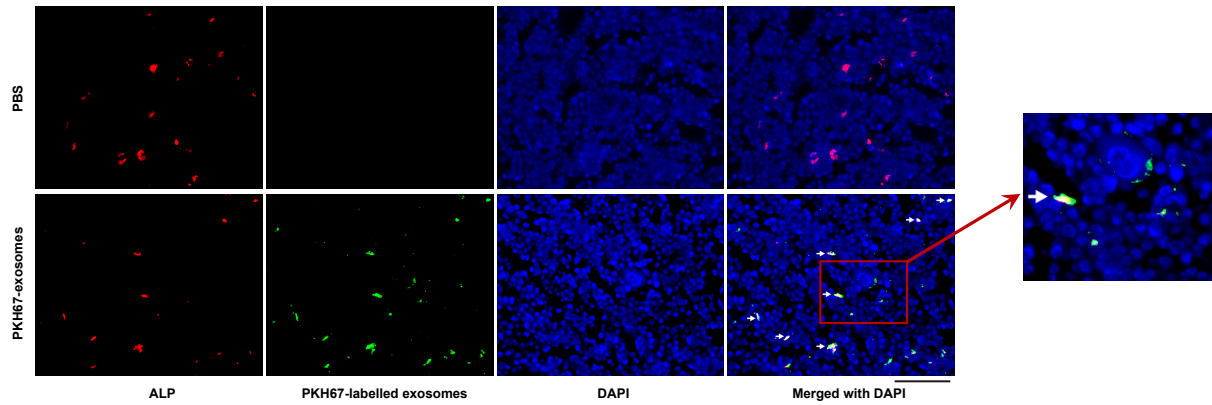

**Supplementary Figure 14 Uptake of PKH67-labelled exosomes by osteoblasts *in vivo*.** Representative fluorescence micrographs of the distal femur cryosections from the mice at 8 h after intravenously injection with either PBS (upper panel) or PKH67-exosomes (lower panel). Immunofluorescence staining was performed to detect ALP<sup>+</sup> osteoblasts (red, left column). The exosomes were labelled with PKH67 (green, middle left column). The cell nuclei were stained by DAPI (Blue, middle right column). Merged images with DAPI staining showing the co-localization (white arrows) of antagomir-214 with upper panel (yellow color, right column). Scale bars, 100  $\mu$ m.

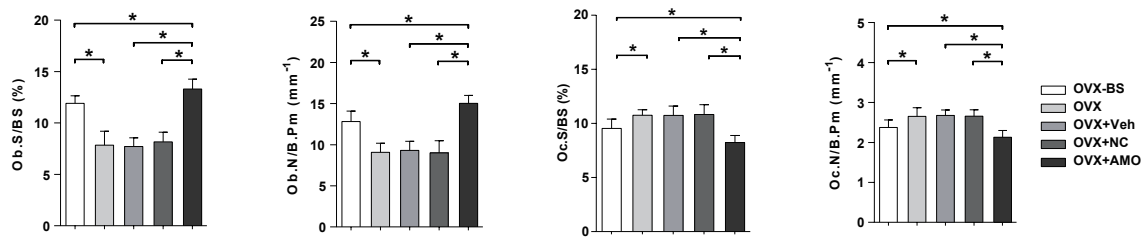

**Supplementary Figure 15 The effect of osteoclast-targeted antagomir-214-3p treatment on bone formation in aging OVX mice.** The values of bone histomorphometry parameters (Ob.S/BS and Ob.N/B.Pm, Oc.S/BS and Oc.N/B.Pm) at the distal femur metaphysis from mice in each group. OVX-BS: mice sacrificed at 6 months after OVX as baseline, OVX: mice administrated with PBS (negative control), OVX+Veh: mice administrated with delivery system only, OVX+NC: mice administrated with antagomir nonsense control with delivery system, OVX+AMO: mice administrated with (D-Asp<sub>8</sub>)-liposome-antagomir-214-3p.  $n=9\sim 10$  for each group. Data are the mean  $\pm$  s.d. \* $P<0.05$ . One-way ANOVA with a *post-hoc* test was performed.

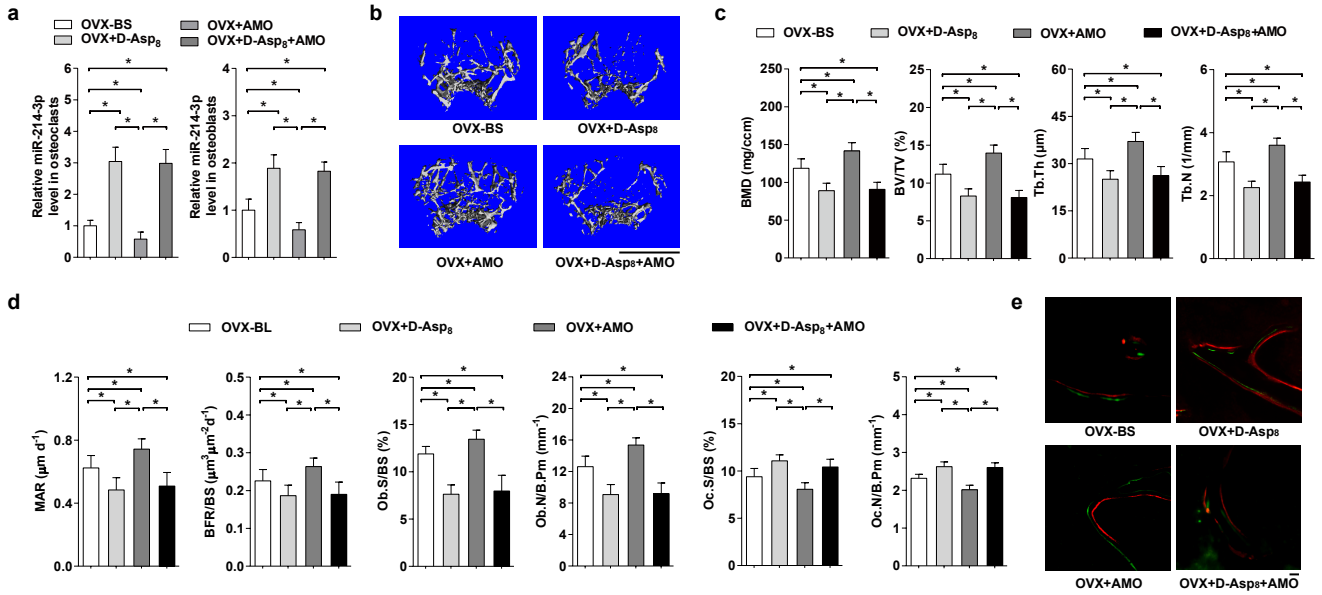

**Supplementary figure 16 Pretreatment with D-Asp<sub>8</sub> prevents the beneficial effect of osteoclast-targeted antagomir-214-3p treatment on bone formation in aging ovariectomized mice.** (a) Real-time PCR analysis of the miR-214-3p levels in osteoclasts (*Ctsk*<sup>+</sup> cells) and osteoblasts (*Alp*<sup>+</sup> cells) isolated from distal femur cryosections by lacer-captured microdissection from mice in each group. (b) Representative micro-CT images of the distal femur metaphysis from the mice in each group. Scale bars: 1 mm. (c) The values of micro-CT parameters (BMD, BV/TV, Tb.Th and Tb.N) at the distal femur metaphysis from the mice in each group. (d) Representative images of new bone formation assessed by double labeling with calcein green and xylenol orange at the distal femur metaphysis from the mice in each group. Scale bars: 10  $\mu$ m. (e) The values of bone histomorphometry parameters (MAR, BFR/BS, Ob.S/BS, Ob.N/B.Pm, Oc.S/BS and Oc.N/B.Pm) at the distal femur metaphysis from the mice in each group. OVX-BS: mice sacrificed at 6 months after OVX as baseline, OVX+D-Asp<sub>8</sub>: mice administrated with D-Asp<sub>8</sub> alone (negative control), OVX+AMO: mice pretreated with PBS 24 hours ahead of administration with (D-Asp<sub>8</sub>)-liposome-antagomir-214-3p, OVX+D-Asp<sub>8</sub>+AMO: mice pretreated with D-Asp<sub>8</sub> 24 hours ahead of administration with (D-Asp<sub>8</sub>)-liposome-antagomir-214-3p.  $n=6\sim 8$  mice for each group. All data are the mean  $\pm$  s.d. \* $P<0.05$ . One-way ANOVA with a *post-hoc* test was performed.



## Western blot scans

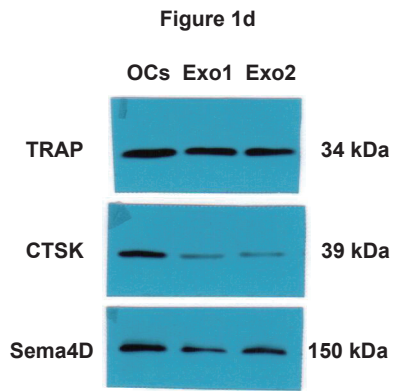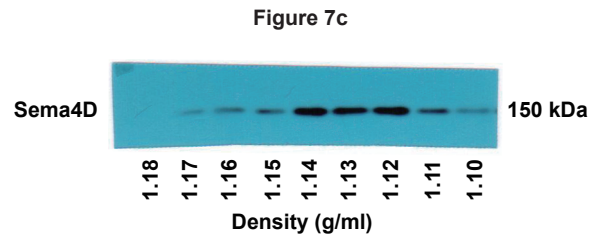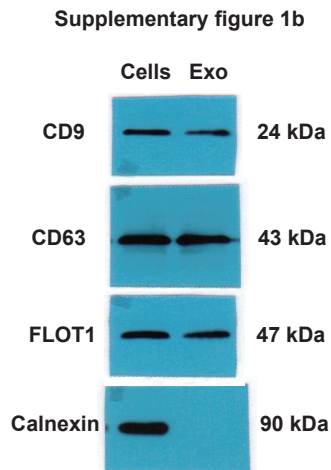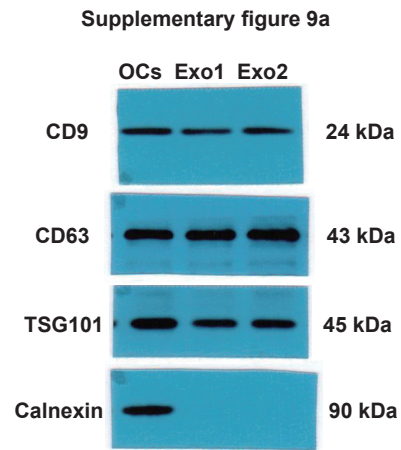

Note: Exo1, exosomes from the supernatant OC-miR-214-3p osteoclasts. Exo2, exosomes from the supernatant of WT osteoclasts.

Supplementary figure 17 The uncropped western blot scans.

**Supplementary Table 1 twelve miRNAs examined in whole serum, serum exosomes and bone specimens**

| <b>miRNA name</b> | <b>Sequence</b>          | <b>Accession</b> |
|-------------------|--------------------------|------------------|
| hsa-miR-214-3p    | ACAGCAGGCACAGACAGGCAGU   | MIMAT0000271     |
| mmu-miR-214-3p    | ACAGCAGGCACAGACAGGCAGU   | MIMAT0000661     |
| hsa-miR-125b-5p   | UCCCUGAGACCCUAACUUGUGA   | MIMAT0000423     |
| mmu-miR-125b-5p   | UCCCUGAGACCCUAACUUGUGA   | MIMAT0000136     |
| hsa-miR-133b      | UUUGGUCCCCUUCAACCAGCUA   | MIMAT0000770     |
| mmu-miR-133b      | UUUGGUCCCCUUCAACCAGCUA   | MIMAT0000769     |
| hsa-miR-135a-5p   | UAUGGCUUUUUUAUUCCUAUGUGA | MIMAT0000428     |
| mmu-miR-135a-5p   | UAUGGCUUUUUUAUUCCUAUGUGA | MIMAT0000147     |
| hsa-miR-29a-3p    | UAGCACCAUCUGAAAUCGGUUA   | MIMAT0000086     |
| mmu-miR-29a-3p    | UAGCACCAUCUGAAAUCGGUUA   | MIMAT0000535     |
| hsa-miR-29b-3p    | UAGCACCAUUUGAAAUCAGUGUU  | MIMAT0000100     |
| mmu-miR-29b-3p    | UAGCACCAUUUGAAAUCAGUGUU  | MIMAT0000127     |
| hsa-miR-29c-3p    | UAGCACCAUUUGAAAUCGGUUA   | MIMAT0000681     |
| mmu-miR-29c-3p    | UAGCACCAUUUGAAAUCGGUUA   | MIMAT0000536     |
| hsa-miR-141-3p    | UAACACUGUCUGGUAAGAUGG    | MIMAT0000432     |
| mmu-miR-141-3p    | UAACACUGUCUGGUAAGAUGG    | MIMAT0000153     |
| hsa-miR-199a-5p   | CCCAGUGUUCAGACUACCGUUC   | MIMAT0000231     |
| mmu-miR-199a-5p   | CCCAGUGUUCAGACUACCGUUC   | MIMAT0000229     |
| hsa-miR-200a-3p   | UAACACUGUCUGGUAACGAUGU   | MIMAT0000682     |
| mmu-miR-200a-3p   | UAACACUGUCUGGUAACGAUGU   | MIMAT0000519     |
| hsa-miR-206       | UGGAAUGUAAGGAAGUGUGUGG   | MIMAT0000462     |
| mmu-miR-206       | UGGAAUGUAAGGAAGUGUGUGG   | MIMAT0000239     |
| hsa-miR-208a-3p   | AUAAGACGAGCAAAAAGCUUGU   | MIMAT0000241     |
| mmu-miR-208a-3p   | AUAAGACGAGCAAAAAGCUUGU   | MIMAT0000520     |

**Supplementary Table 2 Clinical features of elderly patients with fractures involved in bone specimens' analysis**

| Patient | Age | Gender | T score for BMD at Lumbar Spine | Serum BGLAP | Diagnosis                       | Surgical operation       |
|---------|-----|--------|---------------------------------|-------------|---------------------------------|--------------------------|
| 1       | 61  | Female | -1.11                           | 22.8        | Proximal Femur Fracture (Left)  | Total Hip Replacement    |
| 2       | 62  | Female | -1.23                           | 21.9        | Femoral Neck Fracture (Left)    | Total Hip Replacement    |
| 3       | 63  | Female | -1.18                           | 22.3        | Proximal Femur Fracture (Right) | Femoral Head Replacement |
| 4       | 64  | Female | -1.33                           | 21.6        | Proximal Femur Fracture (Left)  | Total Hip Replacement    |
| 5       | 64  | Female | -1.39                           | 21.1        | Femoral Neck Fracture (Right)   | Total Hip Replacement    |
| 6       | 65  | Female | -1.35                           | 21.4        | Proximal Femur Fracture (Right) | Femoral Head Replacement |
| 7       | 66  | Female | -1.42                           | 19.8        | Femoral Neck Fracture (Right)   | Total Hip Replacement    |
| 8       | 67  | Female | -1.46                           | 20.4        | Proximal Femur Fracture (Right) | Total Hip Replacement    |
| 9       | 67  | Female | -1.45                           | 20.7        | Femoral Neck Fracture (Left)    | Femoral Head Replacement |
| 10      | 68  | Female | -1.48                           | 19.7        | Proximal Femur Fracture (Right) | Total Hip Replacement    |
| 11      | 69  | Female | -1.52                           | 19.2        | Femoral Neck Fracture (Left)    | Total Hip Replacement    |
| 12      | 70  | Female | -1.49                           | 19.6        | Femoral Neck Fracture (Right)   | Total Hip Replacement    |
| 13      | 71  | Female | -1.53                           | 19.3        | Proximal Femur Fracture (Right) | Total Hip Replacement    |
| 14      | 72  | Female | -1.51                           | 19.4        | Femoral Neck Fracture (Right)   | Femoral Head Replacement |
| 15      | 72  | Female | -1.62                           | 18.1        | Femoral Neck Fracture (Left)    | Total Hip Replacement    |
| 16      | 73  | Female | -1.47                           | 19.0        | Femoral Neck Fracture (Right)   | Total Hip Replacement    |
| 17      | 74  | Female | -1.66                           | 17.8        | Proximal Femur Fracture (Left)  | Total Hip Replacement    |
| 18      | 75  | Female | -1.63                           | 18.3        | Femoral Neck Fracture (Right)   | Femoral Head Replacement |
| 19      | 76  | Female | -1.59                           | 19.2        | Proximal Femur Fracture (Right) | Total Hip Replacement    |
| 20      | 76  | Female | -1.65                           | 17.5        | Proximal Femur Fracture (Left)  | Femoral Head Replacement |

|    |    |        |       |      |                                 |                          |
|----|----|--------|-------|------|---------------------------------|--------------------------|
| 21 | 77 | Female | -1.71 | 17.4 | Proximal Femur Fracture (Right) | Femoral Head Replacement |
| 22 | 78 | Female | -1.72 | 16.8 | Femoral Neck Fracture (Right)   | Total Hip Replacement    |
| 23 | 78 | Female | -1.68 | 17.6 | Femoral Neck Fracture (Left)    | Total Hip Replacement    |
| 24 | 78 | Female | -1.74 | 16.9 | Proximal Femur Fracture (Left)  | Total Hip Replacement    |
| 25 | 79 | Female | -1.75 | 16.2 | Proximal Femur Fracture (Right) | Femoral Head Replacement |
| 26 | 79 | Female | -1.72 | 16.5 | Femoral Neck Fracture (Right)   | Total Hip Replacement    |
| 27 | 80 | Female | -1.76 | 15.8 | Proximal Femur Fracture (Right) | Femoral Head Replacement |
| 28 | 81 | Female | -1.77 | 15.6 | Femoral Neck Fracture (Right)   | Total Hip Replacement    |
| 29 | 82 | Female | -1.79 | 14.9 | Proximal Femur Fracture (Right) | Total Hip Replacement    |
| 30 | 83 | Female | -1.80 | 16.2 | Proximal Femur Fracture (Right) | Total Hip Replacement    |
| 31 | 83 | Female | -1.78 | 15.4 | Femoral Neck Fracture (Left)    | Femoral Head Replacement |
| 32 | 84 | Female | -1.82 | 13.6 | Femoral Neck Fracture (Right)   | Femoral Head Replacement |
| 33 | 84 | Female | -1.83 | 14.3 | Proximal Femur Fracture (Right) | Total Hip Replacement    |
| 34 | 85 | Female | -1.79 | 13.8 | Femoral Neck Fracture (Right)   | Total Hip Replacement    |
| 35 | 85 | Female | -1.81 | 12.9 | Femoral Neck Fracture (Left)    | Total Hip Replacement    |
| 36 | 86 | Female | -1.80 | 13.4 | Femoral Neck Fracture (Left)    | Femoral Head Replacement |
| 37 | 87 | Female | -1.84 | 13.2 | Proximal Femur Fracture (Right) | Total Hip Replacement    |
| 38 | 88 | Female | -1.89 | 12.4 | Proximal Femur Fracture (Right) | Total Hip Replacement    |
| 39 | 88 | Female | -1.85 | 13.1 | Femoral Neck Fracture (Right)   | Total Hip Replacement    |
| 40 | 89 | Female | -1.88 | 11.7 | Proximal Femur Fracture (Right) | Femoral Head Replacement |

**Supplementary Table 3 Clinical features of age-matched patients without fractures involved in bone specimens' analysis**

| Patient | Age | Gender | T score for BMD at Lumbar Spine | Serum BGLAP | Diagnosis              | Site       | Surgical operation               |
|---------|-----|--------|---------------------------------|-------------|------------------------|------------|----------------------------------|
| 1       | 62  | Female | -0.79                           | 25.1        | Repetitive dislocation | Right hip  | Revision total hip arthroplasty  |
| 2       | 62  | Female | -0.84                           | 24.6        | Implant loosening      | Right hip  | Revision total hip arthroplasty  |
| 3       | 63  | Female | -0.91                           | 22.9        | Implant loosening      | Left hip   | Revision total hip arthroplasty  |
| 4       | 64  | Female | -0.97                           | 22.5        | Infection              | Left knee  | Revision total knee arthroplasty |
| 5       | 65  | Female | -1.03                           | 23.8        | Repetitive dislocation | Right hip  | Revision total hip arthroplasty  |
| 6       | 65  | Female | -1.01                           | 21.6        | Infection              | Left knee  | Revision total knee arthroplasty |
| 7       | 67  | Female | -1.14                           | 20.8        | Implant loosening      | Right knee | Revision total knee arthroplasty |
| 8       | 69  | Female | -1.19                           | 22.5        | Repetitive dislocation | Right hip  | Revision total hip arthroplasty  |
| 9       | 70  | Female | -1.38                           | 19.9        | Repetitive dislocation | Left hip   | Revision total hip arthroplasty  |
| 10      | 71  | Female | -1.33                           | 19.6        | Implant loosening      | Right knee | Revision total knee arthroplasty |
| 11      | 72  | Female | -1.41                           | 20.3        | Implant loosening      | Left knee  | Revision total knee arthroplasty |
| 12      | 74  | Female | -1.42                           | 19.3        | Implant loosening      | Left hip   | Revision total hip arthroplasty  |
| 13      | 75  | Female | -1.37                           | 18.2        | Infection              | Right knee | Revision total knee arthroplasty |
| 14      | 77  | Female | -1.52                           | 18.5        | Repetitive dislocation | Right hip  | Revision total hip arthroplasty  |
| 15      | 78  | Female | -1.53                           | 18.9        | Implant loosening      | Left hip   | Revision total hip arthroplasty  |
| 16      | 81  | Female | -1.57                           | 17.9        | Implant loosening      | Left knee  | Revision total knee arthroplasty |
| 17      | 82  | Female | -1.61                           | 16.7        | Implant loosening      | Right hip  | Revision total hip arthroplasty  |
| 18      | 83  | Female | -1.58                           | 16.8        | Implant loosening      | Right hip  | Revision total hip arthroplasty  |
| 19      | 84  | Female | -1.65                           | 15.8        | Infection              | Right knee | Revision total knee arthroplasty |
| 20      | 87  | Female | -1.72                           | 15.6        | Implant loosening      | Right knee | Revision total knee arthroplasty |
| 21      | 89  | Female | -1.74                           | 15.5        | Infection              | Left hip   | Revision total hip arthroplasty  |

Supplementary Table 4 Raw CT for Figure 1b

| CT value | Serum   |      |             |      | Serum exosomes |      |             |      | Bone specimens |      |             |      |
|----------|---------|------|-------------|------|----------------|------|-------------|------|----------------|------|-------------|------|
|          | Age Mat |      | Elderly Pat |      | Age Mat        |      | Elderly Pat |      | Age Mat        |      | Elderly Pat |      |
|          | 214     | U6   | 214         | U6   | 214            | U6   | 214         | U6   | 214            | U6   | 214         | U6   |
| 60-69    | 23.5    | 22.6 | 22.7        | 22.2 | 25.9           | 24.9 | 24.7        | 24.1 | 19.1           | 18.2 | 20.7        | 18.2 |
|          | 24.4    | 22.2 | 22.6        | 22.1 | 26.6           | 24.4 | 25.3        | 24.2 | 19.9           | 18.2 | 19.5        | 17.9 |
|          | 22.7    | 22.5 | 22.3        | 22.5 | 24.6           | 24.4 | 24.1        | 24.2 | 18.7           | 18.1 | 19.0        | 18.0 |
|          | 22.5    | 22.9 | 22.4        | 22.1 | 24.0           | 24.5 | 25.2        | 24.2 | 18.0           | 17.9 | 19.3        | 18.0 |
|          | 23.3    | 22.4 | 22.0        | 22.1 | 25.0           | 24.2 | 24.3        | 24.4 | 19.2           | 17.9 | 19.2        | 18.3 |
|          | 23.2    | 22.4 | 22.6        | 22.3 | 25.3           | 24.5 | 24.7        | 24.5 | 19.7           | 17.6 | 19.5        | 17.9 |
|          | 22.2    | 22.4 | 22.0        | 22.4 | 24.7           | 24.9 | 23.6        | 24.2 | 18.0           | 18.0 | 18.5        | 18.2 |
|          | 22.5    | 22.8 | 21.6        | 22.4 | 23.8           | 24.1 | 23.8        | 24.7 | 17.5           | 17.4 | 18.0        | 18.1 |
|          |         |      | 22.4        | 22.7 |                |      | 24.6        | 24.3 |                |      | 18.2        | 18.5 |
|          |         |      | 21.6        | 22.5 |                |      | 24.2        | 24.9 |                |      | 17.6        | 18.2 |
|          |         |      | 21.3        | 22.3 |                |      | 23.2        | 24.6 |                |      | 17.6        | 18.1 |
|          | 70-69   | 21.8 | 22.2        | 21.0 | 22.1           | 24.3 | 24.8        | 23.4 | 24.6           | 17.9 | 18.0        | 17.1 |
| 22.8     |         | 22.5 | 21.1        | 22.5 | 24.5           | 24.2 | 23.3        | 24.2 | 18.2           | 17.6 | 16.9        | 18.1 |
| 22.0     |         | 22.1 | 21.3        | 22.9 | 24.3           | 24.5 | 23.3        | 24.4 | 18.0           | 17.6 | 17.1        | 18.1 |
| 21.3     |         | 22.3 | 21.4        | 23.0 | 23.2           | 24.2 | 22.8        | 24.4 | 18.1           | 17.9 | 16.3        | 17.8 |
| 21.4     |         | 22.2 | 20.8        | 22.6 | 23.6           | 24.4 | 22.5        | 24.1 | 17.2           | 18.0 | 16.6        | 18.2 |
| 22.8     |         | 23.0 | 20.9        | 22.2 | 23.9           | 24.2 | 23.6        | 24.5 | 17.9           | 18.2 | 16.0        | 17.6 |
| 21.9     |         | 22.6 | 20.6        | 22.4 | 23.5           | 24.3 | 23.1        | 24.9 | 17.8           | 18.5 | 16.3        | 18.2 |
|          |         |      | 20.4        | 22.4 |                |      | 23.5        | 25.0 |                |      | 16.1        | 17.9 |
|          |         |      | 21.1        | 22.7 |                |      | 22.7        | 24.4 |                |      | 15.6        | 17.9 |
|          |         |      | 20.1        | 22.4 |                |      | 22.7        | 24.7 |                |      | 16.0        | 18.1 |
|          |         |      | 20.2        | 22.4 |                |      | 22.9        | 24.8 |                |      | 16.3        | 18.1 |
|          |         |      | 19.9        | 22.2 |                |      | 22.4        | 24.8 |                |      | 16.0        | 18.2 |
|          |         | 20.3 | 22.4        |      |                | 22.7 | 24.8        |      |                | 16.3 | 18.5        |      |
|          |         | 20.6 | 22.7        |      |                | 22.6 | 24.4        |      |                | 15.8 | 18.1        |      |
|          |         | 20.1 | 22.8        |      |                | 22.2 | 24.4        |      |                | 15.8 | 18.1        |      |
| 80-89    | 21.5    | 22.7 | 19.8        | 22.4 | 23.2           | 24.5 | 21.8        | 24.2 | 17.4           | 18.3 | 15.7        | 17.8 |
|          | 21.1    | 22.2 | 20.1        | 22.4 | 23.6           | 24.8 | 22.1        | 24.5 | 17.5           | 18.0 | 15.5        | 17.8 |
|          | 21.7    | 22.5 | 20.5        | 22.7 | 23.4           | 24.2 | 22.9        | 24.7 | 17.0           | 18.1 | 15.8        | 18.1 |
|          | 21.8    | 22.6 | 20.0        | 22.7 | 23.4           | 24.2 | 22.0        | 24.9 | 17.8           | 18.2 | 15.5        | 18.0 |
|          | 21.7    | 22.4 | 19.8        | 22.5 | 23.9           | 24.7 | 21.6        | 24.4 | 17.4           | 18.5 | 15.7        | 18.2 |
|          | 20.9    | 22.5 | 20.4        | 22.5 | 23.0           | 24.6 | 23.1        | 24.8 | 17.4           | 18.0 | 15.9        | 18.5 |
|          |         |      | 19.8        | 22.6 |                |      | 21.5        | 24.2 |                |      | 16.0        | 18.6 |
|          |         |      | 19.6        | 22.6 |                |      | 22.0        | 24.5 |                |      | 15.3        | 18.0 |
|          |         |      | 19.6        | 22.6 |                |      | 21.5        | 24.6 |                |      | 15.1        | 17.8 |
|          |         |      | 20.1        | 22.7 |                |      | 22.0        | 24.6 |                |      | 15.2        | 17.9 |

---

|      |      |      |      |      |      |
|------|------|------|------|------|------|
| 19.5 | 22.4 | 21.6 | 24.6 | 15.1 | 17.9 |
| 20.2 | 22.8 | 22.6 | 24.7 | 15.4 | 18.2 |
| 19.1 | 22.2 | 21.9 | 24.7 | 15.7 | 18.6 |
| 19.5 | 22.5 | 21.6 | 24.4 | 15.7 | 18.8 |

---

Note: Age Mat, age-matched patients without fracture. Elderly Pat, elderly patients with fracture. 214, miR-214-3p. U6, RUN6B.

**Supplementary Table 5 Raw data for real time-PCR**

Raw data for Figure 1b

| Groups                      |                                       | 60-69            | 70-79     | 80-89      |           |
|-----------------------------|---------------------------------------|------------------|-----------|------------|-----------|
| Serum<br>miR-214-3p         | Age-matched patients without fracture | $2^{-\Delta CT}$ | 0.80±0.40 | 1.37±0.38  | 2.05±0.49 |
|                             | Elderly patients with fracture        | $2^{-\Delta CT}$ | 1.25±0.47 | 3.76±01.19 | 6.52±1.35 |
| Exosomal<br>miR-214-3p      | Age-matched patients without fracture | $2^{-\Delta CT}$ | 0.83±0.42 | 1.42±0.40  | 2.13±0.51 |
|                             | Elderly patients with fracture        | $2^{-\Delta CT}$ | 1.19±0.66 | 3.28±1.01  | 5.97±1.55 |
| Intra-osseous<br>miR-214-3p | Age-matched patients without fracture | $2^{-\Delta CT}$ | 0.61±0.30 | 1.16±0.43  | 1.72±0.35 |
|                             | Elderly patients with fracture        | $2^{-\Delta CT}$ | 0.77±0.48 | 3.59±1.06  | 6.27±1.02 |

Raw data for Figure 1c

| Groups          |                                | 60-69            | 70-79     | 80-89     |           |
|-----------------|--------------------------------|------------------|-----------|-----------|-----------|
| BGLAP/<br>GAPDH | Elderly patients with fracture | $2^{-\Delta CT}$ | 0.94±0.21 | 0.53±0.21 | 0.19±0.14 |

Raw data for Figure 1g

| Groups                         |                  | OVX-6mon-BS | OVX-9mon   | OVX-12mon  |
|--------------------------------|------------------|-------------|------------|------------|
| Serum<br>miR-214-3p            | $2^{-\Delta CT}$ | 0.86±0.32   | 3.40±1.07  | 6.31±1.06  |
| Exosomal<br>miR-214-3p         | $2^{-\Delta CT}$ | 0.88±0.33   | 3.29±1.43  | 7.04±1.96  |
| Osteoclastic<br>pri-miR-214-3p | $2^{-\Delta CT}$ | 2.19±0.51   | 3.42±0.49  | 4.43±0.59  |
| Osteoclastic<br>pre-miR-214-3p | $2^{-\Delta CT}$ | 3.21±0.82   | 6.50±1.06  | 10.29±1.56 |
| Osteoclastic<br>miR-214-3p     | $2^{-\Delta CT}$ | 4.50±2.79   | 12.90±3.79 | 21.65±5.65 |



## Raw data for Figure 2c-1

| Groups         |                  | Wild type |           | OC-miR-214-3p |           |
|----------------|------------------|-----------|-----------|---------------|-----------|
|                |                  | OCs       | Non-OCs   | OCs           | Non-OCs   |
| Pri-miR-214-3p | $2^{-\Delta CT}$ | 1.95±0.51 | 0.57±0.10 | 9.30±0.77     | 0.61±0.15 |
| Pre-miR-214-3p | $2^{-\Delta CT}$ | 3.15±0.75 | 0.92±0.11 | 18.43±1.96    | 0.93±0.19 |
| miR-214-3p     | $2^{-\Delta CT}$ | 4.79±1.13 | 1.58±0.21 | 31.94±2.84    | 2.66±0.30 |

## Raw data for Figure 2c-2

| Groups                    |                  | Wild type | OC-miR-214-3p |
|---------------------------|------------------|-----------|---------------|
| Serom exosomal miR-214-3p | $2^{-\Delta CT}$ | 0.82±0.20 | 4.10±0.74     |

## Raw data for Figure 2d

| Groups     |                  | Wild type   | OC-miR-214-3p |
|------------|------------------|-------------|---------------|
| ALP mRNA   | $2^{-\Delta CT}$ | 0.120±0.018 | 0.053±0.011   |
| OPN mRNA   | $2^{-\Delta CT}$ | 0.410±0.065 | 0.215±0.038   |
| BSP mRNA   | $2^{-\Delta CT}$ | 0.050±0.006 | 0.031±0.008   |
| BGLAP mRNA | $2^{-\Delta CT}$ | 0.150±0.022 | 0.084±0.013   |

## Raw data for Figure 3a

| Groups                                |                  | No OC     | WT        | OC-miR-214-3p |
|---------------------------------------|------------------|-----------|-----------|---------------|
| miR-214-3p in OC supernatant          | $2^{-\Delta CT}$ | 0.24±0.04 | 2.79±0.32 | 7.75±0.43     |
| Exosomal miR-214-3p in OC supernatant | $2^{-\Delta CT}$ | 0.30±0.06 | 3.25±0.25 | 9.07±0.39     |
| miR-214-3p in osteoblasts             | $2^{-\Delta CT}$ | 0.40±0.06 | 0.88±0.05 | 2.46±0.07     |

## Raw data for Figure 3b

| Groups                        |                  | No OC       | WT          | OC-miR-214-3p |
|-------------------------------|------------------|-------------|-------------|---------------|
| Pri-miR-214-3p in osteoblasts | $2^{-\Delta CT}$ | 0.260±0.038 | 0.263±0.031 | 0.251±0.043   |
| Pre-miR-214-3p in osteoblasts | $2^{-\Delta CT}$ | 0.330±0.042 | 0.328±0.056 | 0.325±0.044   |

Raw data for Figure 3c

| Groups     |                  | No OC       | WT          | OC-miR-214-3p |
|------------|------------------|-------------|-------------|---------------|
| ALP mRNA   | $2^{-\Delta CT}$ | 0.110±0.015 | 0.069±0.010 | 0.041±0.008   |
| OPN mRNA   | $2^{-\Delta CT}$ | 0.370±0.054 | 0.246±0.033 | 0.123±0.029   |
| BSP mRNA   | $2^{-\Delta CT}$ | 0.049±0.007 | 0.033±0.006 | 0.023±0.005   |
| BGLAP mRNA | $2^{-\Delta CT}$ | 0.140±0.013 | 0.091±0.016 | 0.051±0.013   |

Raw data for Figure 3e

| Groups     |                        | No OC       | WT          | OC-miR-214-3p | OC-miR-214-3p+<br>Veh | OC-miR-214-3p+<br>3'UTR-NC | OC-miR-214-3p+<br>ATF4 mRNA 3'UTR |
|------------|------------------------|-------------|-------------|---------------|-----------------------|----------------------------|-----------------------------------|
| ALP mRNA   | $2^{-\Delta\text{CT}}$ | 0.110±0.015 | 0.069±0.010 | 0.041±0.008   | 0.042±0.006           | 0.042±0.009                | 0.068±0.011                       |
| OPN mRNA   | $2^{-\Delta\text{CT}}$ | 0.370±0.054 | 0.246±0.033 | 0.123±0.029   | 0.126±0.029           | 0.132±0.032                | 0.242±0.031                       |
| BSP mRNA   | $2^{-\Delta\text{CT}}$ | 0.049±0.007 | 0.033±0.006 | 0.023±0.005   | 0.023±0.004           | 0.023±0.003                | 0.033±0.006                       |
| BGLAP mRNA | $2^{-\Delta\text{CT}}$ | 0.140±0.013 | 0.091±0.016 | 0.051±0.013   | 0.052±0.013           | 0.053±0.017                | 0.092±0.008                       |

Raw data for Figure 3i

| Groups     |                        | No OC         | WT OC     | OC-miR-214-3p |
|------------|------------------------|---------------|-----------|---------------|
| miR-214-3p | $2^{-\Delta\text{CT}}$ | 0.0013±0.0005 | 0.38±0.06 | 1.27±0.14     |

Raw data for Figure 3j

| Groups                           |                        | No OC     | WT osteoclasts | miR-214-3p-depleted OCs |
|----------------------------------|------------------------|-----------|----------------|-------------------------|
| Pri-miR-214-3p in<br>osteoblasts | $2^{-\Delta\text{CT}}$ | 0.23±0.03 | 0.24±0.04      | 0.24±0.04               |
| Pre-miR-214-3p in<br>osteoblasts | $2^{-\Delta\text{CT}}$ | 0.31±0.05 | 0.32±0.05      | 0.31±0.04               |
| miR-214-3p in<br>osteoblasts     | $2^{-\Delta\text{CT}}$ | 0.38±0.05 | 0.91±0.05      | 0.52±0.05               |

Raw data for Figure 4f

| Groups                           |                  | No Exo    | OC Exo    | Exo+Sema4D | Exo+isotype |
|----------------------------------|------------------|-----------|-----------|------------|-------------|
| Pri-miR-214-3p<br>in osteoblasts | $2^{-\Delta CT}$ | 0.28±0.04 | 0.28±0.03 | 0.28±0.04  | 0.28±0.04   |
| Pre-miR-214-3p<br>in osteoblasts | $2^{-\Delta CT}$ | 0.35±0.04 | 0.35±0.06 | 0.34±0.05  | 0.34±0.07   |
| miR-214-3p in<br>osteoblasts     | $2^{-\Delta CT}$ | 0.43±0.05 | 1.27±0.09 | 0.63±0.06  | 1.28±0.08   |

Raw data for Figure 4g

| Groups                           |                  | WT-Exo    | miR-214-3p-Exo |
|----------------------------------|------------------|-----------|----------------|
| Pri-miR-214-3p in<br>osteoblasts | $2^{-\Delta CT}$ | 0.32±0.06 | 0.34±0.005     |
| Pre-miR-214-3p in<br>osteoblasts | $2^{-\Delta CT}$ | 0.34±0.05 | 0.35±0.06      |
| miR-214-3p in<br>osteoblasts     | $2^{-\Delta CT}$ | 0.41±0.09 | 0.98±0.14      |

Raw data for Figure 4h

| Groups     |                  | WT-Exo      | miR-214-3p-Exo |
|------------|------------------|-------------|----------------|
| ALP mRNA   | $2^{-\Delta CT}$ | 0.060±0.009 | 0.027±0.006    |
| OPN mRNA   | $2^{-\Delta CT}$ | 0.230±0.038 | 0.119±0.035    |
| BSP mRNA   | $2^{-\Delta CT}$ | 0.030±0.006 | 0.019±0.005    |
| BGLAP mRNA | $2^{-\Delta CT}$ | 0.091±0.014 | 0.050±0.010    |

Raw data for Figure 5b

| Groups                    |                  | OVX-BL    | OVX       | OVX+Veh   | OVX+NC    | OVX+AMO   | Sham      |
|---------------------------|------------------|-----------|-----------|-----------|-----------|-----------|-----------|
| miR-214-3p in osteoclasts | $2^{-\Delta CT}$ | 1.71±0.34 | 5.23±0.55 | 5.33±0.59 | 5.37±0.62 | 1.05±0.34 | 0.73±0.29 |
| miR-214-3p in osteoblasts | $2^{-\Delta CT}$ | 0.16±0.03 | 0.30±0.03 | 0.31±0.03 | 0.30±0.03 | 0.09±0.02 | 0.05±0.02 |

**Supplementary Table 6 Primers used for real-time PCR**

| Gene                | Primers (5'-3')            |                         |
|---------------------|----------------------------|-------------------------|
|                     | Forward                    | Reverse                 |
| Human <i>BGLAP</i>  | CACTCCTCGCCCTATTGGC        | CCCTCCTGCTTGGACACAAAG   |
| Human <i>GAPDH</i>  | CTGGGCTACACTGAGCACC        | AAGTGGTCGTTGAGGGCAATG   |
| Mouse <i>Atf4</i>   | CCTGAACAGCGAAGTGTTGG       | TGGAGAACCCATGAGGTTTCAA  |
| Mouse <i>Bglap</i>  | TGCTTGTGACGAGCTATCAG       | GAGGACAGGGAGGATCAAGT    |
| Mouse <i>Gapdh</i>  | AGGTCGGTGTGAACGGATTTG      | TGTAGACCATGTAGTTGAGGTCA |
| Mouse <i>Alp</i>    | CCAACTCTTTTGTGCCAGAGA      | GGCTACATTGGTGTGAGCTTTT  |
| Mouse <i>Col1a1</i> | GCTCCTCTTAGGGGCCACT        | CCACGTCTCACCATTGGGG     |
| Mouse <i>Opn</i>    | AGCAAGAACTCTTCCAAGCAA      | GTGAGATTCGTCAGATTCATCCG |
| Mouse <i>Bsp</i>    | ATGGAGACGGCGATAGTTCC       | CTAGCTGTTACACCCGAGAGT   |
| Mouse <i>Runx2</i>  | ATGGGACTGTGGTTACCGTCAT     | AAGGTGAACTCTTGCCCTCGTC  |
| Mouse <i>Osx</i>    | AGCGACCACTTGAGCAAACAT      | GCGGCTGATTGGCTTCTTCT    |
| Mouse <i>Trap</i>   | GTGGAAGCCTCTGGAAAATC       | CTCCTCCCTCACACCCGTTA    |
| Mouse <i>Ctsk</i>   | GAAGAAGACTCACCAGAAGCAG     | TCCAGGTTATGGGCAGAGATT   |
| Mouse <i>Rank</i>   | TAATCCAGCAGGGAAGCA         | CACAGCCCTCAGAATCCA      |
| Mouse <i>Oscar</i>  | CCGTGCTGACTTCACACCAA       | GGGGTGACAAGGCCACTTTT    |
| Mouse <i>NFATc1</i> | AGTCATCGGCGGGAAGAAG        | CCATTGGCAGGAAGGTACG     |
| Mouse <i>Sost1</i>  | CCACAGAGGTCATCCCA          | GACACATCTTTGGCGTCATAG   |
| Mouse <i>Dmp1</i>   | AGTGAGTCATCAGAAGAAAGTCAAGC | CTATACTGGCCTCTGT        |
